# Supplementary material for: Energy barriers and cell migration in densely packed tissues
Source: Royal Society of Chemistry journal article supplement (doi:10.1039/c3sm52893f), 2014-01-01
Supplement: c3sm52893f1.pdf [file c3sm52893f1.pdf]

# Supplementary Information for Energy barriers and cell migration in densely packed tissues<sup>†</sup>

Dapeng Bi\*, J. H. Lopez\*, J. M. Schwarz\* and M. Lisa Manning\*<sup>a</sup>

Received Xth XXXXXXXXXX 20XX, Accepted Xth XXXXXXXXXX 20XX

First published on the web Xth XXXXXXXXXX 200X

DOI: 10.1039/b000000x

## 1 Aboov-Weaire law

In a cellular packing where all vertices are three-edge coordinated, the coordination number of nearest adjacent neighbors are correlated and can be described by the empirical Aboav-Weaire law<sup>1</sup>:

$$\langle z_{n.n.}(z) \rangle \approx A + B/z, \quad (1)$$

where  $z$  is the coordination number of a given cell and  $z_{n.n.}$  is the coordination number of its neighbor. The  $\langle \dots \rangle$  notation means averaging over all cells in the packing. As shown in Fig. 1, this also holds for the packings used in this work.

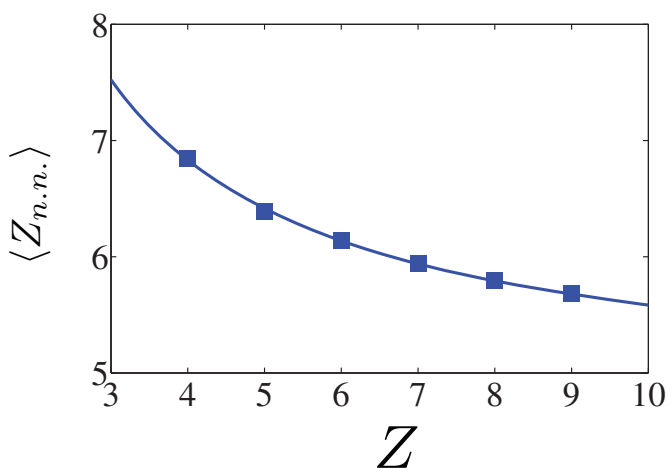

**Fig. 1** The topological correlations from cell packings used in our simulations are represented by the blue squares.  $Z$  is the number of neighbors for a cell, and  $\langle z_{n.n.} \rangle$  is the average number of neighbors of the nearest neighbors. The solid blue line is fitting using Aboav-weaire law, with  $A$  and  $B$  as fitting parameters

<sup>†</sup> Electronic Supplementary Information (ESI) available: [details of any supplementary information available should be included here]. See DOI: 10.1039/b000000x/

\* Department of Physics, Syracuse University, Syracuse, NY 13244, USA Fax: +1 315 443 9103; Tel: +1 315 443 3920; E-mail: [mmanning@syr.edu](mailto:mmanning@syr.edu)

<sup>b</sup> Syracuse Biomaterials Institute, Syracuse, NY 13244, USA

Therefore, for the four cells involved in a T1 transition labeled S1, S2, E1 and E2, their topologies are not independent from each other. Statistically, given  $Z_{S1}$  and  $Z_{S2}$  it is possible to determine  $Z_{E1}$  and  $Z_{E2}$ .

## 2 Trap Model for glasses

The trap model for glasses<sup>2</sup> models a system with a complex potential energy landscape, that is captured by a quenched distribution  $\rho(\Delta u)$ . The simple assumption is that the evolution between different metastable states occur via activated processes. The probability for a state to be in trap labeled by  $\Delta u$  at time  $t$ ,  $P(\Delta u, t)$ , evolves according to the master equation<sup>2</sup>:

$$\frac{d}{dt}P(\Delta u, t) = -\omega_0 e^{-\Delta u/\varepsilon} P(\Delta u, t) + \omega(t) \rho(\Delta u). \quad (2)$$

In Eq. (2), the first term on the r.h.s. is the rate of escape from trap labeled by  $\Delta u$ . This is modeled as an activated process where the fluctuation is given by  $\varepsilon$ . In thermal systems  $\varepsilon = k_B T$ .  $\omega_0$  is an inherent attempt frequency which is assumed to be independent of  $\varepsilon$ . The second term on the r.h.s. of Eq. (2) is the rate of entering a trap with  $\Delta u$ , where a time dependent attempt frequency is given by

$$\omega(t) = \omega_0 \int_0^\infty d\Delta u P(\Delta u, t) e^{-\Delta u/\varepsilon}. \quad (3)$$

The rate of entering includes  $\rho(\Delta u)$  which is the underlying distribution of the trap depth  $\Delta u$  in the potential energy landscape.

Here we chose the form of  $\rho(\Delta u)$  from the simulation result of the main text

$$\rho(\Delta u) = \frac{1}{\varepsilon_0} e^{-\Delta u/\varepsilon_0}. \quad (4)$$

### 2.1 Steady state solution

For this work we are interested in the steady state solution to Eq. (2) which is given by

$$f_{ss}(\Delta u) = \frac{\varepsilon - \varepsilon_0}{\varepsilon \varepsilon_0} e^{-\Delta u(1-1/x)} \quad (5)$$

where  $x = \varepsilon/\varepsilon_0$ . For  $x < 1$  the system is glassy, since Eq. (5) is not normalizable. For  $x > 1$  which is normalizable only when  $x \geq 1$ . The steady state distribution (Eq. 5 in main text) can also be written in terms of the trapping time  $\tilde{\tau}$ , which is the inverse of the escape rate  $\tilde{\tau} = e^{\Delta u/x}$

$$g_{ss}(\tilde{\tau}) = f_{ss}(\Delta u) \frac{d\Delta u}{d\tilde{\tau}} \propto \tau^{-x}. \quad (6)$$

## 2.2 Two-time correlation function

We also study dynamics of the trap model in terms of two-time correlation for a particle starting in one trap at time  $t = 0$  and remaining in the same at  $t$ . The probability that a state is in a trap labelled by  $\Delta u$  at  $t = 0$  will stay in the same state  $\Delta u$  at time  $t$  is given by the homogeneous part of the solution of Eq. (2):

$$\mathcal{F}_{\Delta u}^{stay}(t) = f_{ss}(\Delta u) \exp \left[ -\omega_0 e^{-\Delta u/x} t \right]. \quad (7)$$

A two-time correlation function can be defined by including the contribution from all initial traps  $\Delta u$ ,

$$c_{trap}(0, t) = \int_0^\infty d\Delta u \mathcal{F}_{\Delta u}^{stay}(t) = \frac{x-1}{(\omega_0 t)^{x-1}} \int_0^{\omega_0 t} dw w^{x-2} e^{-w}. \quad (8)$$

A plot of  $c_{trap}(0, t)$  for different values of  $x = \varepsilon/\varepsilon_0$  is shown in Fig. 3(a) of the main text.

## 3 Soft Glassy Rheology model for tissues

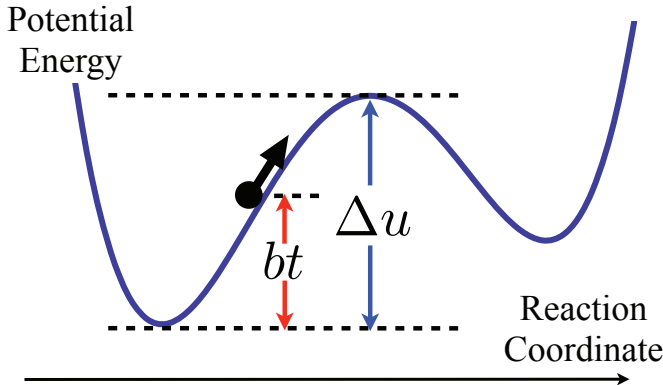

**Fig. 2** A schematic of the model for glassy dynamics in tissues.  $\Delta u$  labels the trap (represented by the black dot with arrow).  $bt$  is the amount of energy generated as the cell moves in a directed manner.

Following the ideas of Soft Glassy Rheology<sup>3</sup>, we model self-propelled, directed motion in a simple way, by assuming the cell generates energy at a constant rate  $b$  that allows it to traverse the Potential Energy Landscape. At time  $t$ , directed cell motion has consumed energy  $\sim bt$ , bringing it

closer to a T1 rearrangement, and making the effective barrier height  $\Delta u - bt$ . There is also a finite probability for it to undergo a rearrangement due to non-directed fluctuations in its shape; we describe this as an activated process controlled by a temperature-like parameter  $\varepsilon$ . Then the rate for overcoming a barrier at time  $t$  can be written as

$$R = \omega_0 \exp \left[ -(\Delta u - bt)/\varepsilon \right]. \quad (9)$$

After escaping a trap with the rate given in Eq. (9), the T1 four-cell region enters into a new trap chosen from the distribution  $\rho(\Delta u)$ . A master equation can be written<sup>3</sup> to describe the evolution of the four-cell T1 location:

$$\begin{aligned} \frac{\partial}{\partial t} P(\Delta u, t) = & -\omega_0 e^{-[\Delta u - bt]/\varepsilon} P(\Delta u, t) \\ & + \rho(\Delta u) \int d\Delta u' \omega_0 e^{-[\Delta u' - bt]/\varepsilon} P(\Delta u', t), \end{aligned} \quad (10)$$

where  $P(\Delta u, t)$  is the probability that T1 location is in trap labeled by  $\Delta u$  at time  $t$ . On the r.h.s., the first term describes the rate of hopping out of a trap and second term is the total rate of entering trap with  $\Delta u$ , which is proportional to  $\rho(\Delta u)$ , the distribution of choosing a new trap.

Equation 10 can be rewritten in terms of non-dimensionalized time  $s = \omega_0 t$  and energy  $u = \Delta u/\varepsilon_0$

$$\begin{aligned} \frac{\partial}{\partial s} f(u, s) = & -e^{-(u-Bs)/x} f(u, s) + e^{-u} \int du' e^{-(u'-Bs)/x} f(u', s) \end{aligned} \quad (11)$$

where we have also introduced the dimensionless parameters  $B = b/(\omega_0 \varepsilon_0)$  and  $x = \varepsilon/\varepsilon_0$ .

The steady-state solution of Eq. 11 is the same as the result for the trap model Eq. (5):

$$f_{ss}(u) = (1 - 1/x) e^{-u(1-1/x)}, \quad (12)$$

which is not normalizable for  $1 < 1/x$  or  $\varepsilon > \varepsilon_0$ . This indicates a glass transition at  $\varepsilon = \varepsilon_0$ .

The probability that a T1 location with  $u$  at  $s = 0$  will stay in the same state  $u$  at time  $s$  is given by the homogeneous part of the solution of Eq. (11):

$$\mathcal{F}_u^{stay}(s) = f_{ss}(u) \exp \left[ -\frac{x}{B} e^{-u/x} (e^{Bs/x} - 1) \right]. \quad (13)$$

A two-time correlation function can be defined by including the contribution from all traps depths  $u$ ,

$$c_{sgr}(0, s) = \int_0^\infty du \mathcal{F}_u^{stay}(t) = \frac{x-1}{y(s)^{x-1}} \int_0^{y(s)} dw w^{x-2} e^{-w}, \quad (14)$$

where  $y(s) = \frac{x}{B} (e^{Bs/x} - 1)$ . We can define a caging time as the value of  $\tau$  such that  $C_{sgr}(0, \tau) = e^{-1}$ . The dependence of  $\tau$  on  $x = \varepsilon/\varepsilon_0$  and  $B = b/(\omega_0 \varepsilon_0)$  is plotted in Fig. 3.

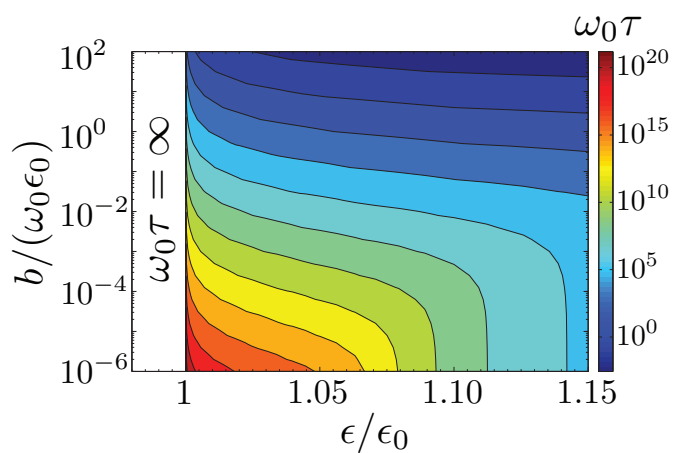

**Fig. 3** Eq. (14) is used to define a caging time  $\tau$ , such that  $c(0, \tau) = e^{-1}$ , as a function of the two dimensionless parameters of the model.

## References

- 1 D. L. Weaire and S. Hutzler, The physics of foams, Oxford University Press, 1999.
- 2 C. Monthus and J.-P. Bouchaud, Journal of Physics A: Mathematical and General, 1996, **29**, 3847.
- 3 P. Sollich, Phys. Rev. E, 1998, **58**, 738–759.
